# Supplementary material for: Identification of MAGEC2/CT10 as a High Calcium-Inducible Gene in Triple-Negative Breast Cancer
Source: Frontiers journal article supplement (doi:10.3389/fendo.2022.816598), 2022-03-10
Supplement: Data_Sheet_1.pdf [file Data_Sheet_1.pdf]

## *Supplementary Material*

### 1 Supplementary Tables

**Table S1. TaqMan gene expression assays used in this study**

| Assay ID      | Gene symbol | Gene Description                                       |
|---------------|-------------|--------------------------------------------------------|
| Hs00171851_m1 | FOSB        | FosB proto-oncogene, AP-1 transcription factor subunit |
| Hs04194186_s1 | FOS         | Fos proto-oncogene, AP-1 transcription factor subunit  |
| Hs01114274_m1 | IL24        | Interleukin 24                                         |
| Hs01055413_g1 | IL11        | Interleukin 11                                         |
| Hs00985641_m1 | IL6         | Interleukin 6                                          |
| Hs01854535_s1 | MAGEC2      | MAGE family member C2                                  |
| Hs00152928_m1 | EGR1        | Early growth response 1                                |
| Hs01010736_m1 | SERPINB2    | Serpin family B member 2                               |
| Hs00189369_m1 | DNM1        | Dynamin 1                                              |
| Hs00236216_m1 | ITGB4       | Integrin subunit beta 4                                |
| Hs00161638_m1 | SCG5        | Secretogranin V                                        |
| Hs01084940_m1 | NCF2        | neutrophil cytosolic factor 2                          |
| Hs01060665_g1 | ACTB*       | Actin beta                                             |
| Hs02786624_g1 | GAPDH*      | Glyceraldehyde-3-phosphate dehydrogenase               |

\* ACTB and GAPDH were used as housekeeping gene expression controls.

**Table S2. Up regulated genes at high calcium**

| <b>GENE<br/>SYMBOL</b> | <b>GENE DESCRIPTION</b>                                              | <b>FOLD<br/>CHANGE</b> | <b>P-VALUE</b> |
|------------------------|----------------------------------------------------------------------|------------------------|----------------|
| FOSB                   | FBJ murine osteosarcoma viral oncogene homolog B                     | 3.1307                 | 0.0054         |
| FOS                    | FBJ murine osteosarcoma viral oncogene homolog                       | 2.7834                 | 0.0051         |
| MAGEC2                 | Melanoma antigen family C, 2                                         | 2.5627                 | 0.0039         |
| SERPINB2               | Serpin peptidase inhibitor, clade B (ovalbumin), member 2            | 2.5328                 | 0.0005         |
| NCF2                   | Neutrophil cytosolic factor 2                                        | 2.2339                 | 0.0010         |
| ID3                    | Inhibitor of DNA binding 3, dominant negative helix-loop-helix       | 2.1861                 | 0.0173         |
| ACTG2                  | Actin, gamma 2, smooth muscle, enteric                               | 2.1772                 | 0.0134         |
| SSX1                   | Synovial sarcoma, X breakpoint 1                                     | 2.1701                 | 0.0208         |
| PDE1C                  | Phosphodiesterase 1C, calmodulin-dependent 70kDa                     | 2.0546                 | 0.0206         |
| SPANXE                 | SPANX family, member E                                               | 2.0388                 | 0.0075         |
| SNORA14B               | Small nucleolar RNA, H/ACA box 14B                                   | 2.0051                 | 0.0030         |
| FRMD3                  | FERM domain containing 3                                             | 1.9955                 | 0.0016         |
| FRMPD4                 | FERM and PDZ domain containing 4                                     | 1.9895                 | 0.0100         |
| IL24                   | Interleukin 24                                                       | 1.9708                 | 0.0019         |
| IL11                   | Interleukin 11                                                       | 1.9645                 | 0.0003         |
| SCG5                   | Secretogranin V (7B2 protein)                                        | 1.9512                 | 0.0118         |
| SNORA1                 | Small nucleolar RNA, H/ACA box 1                                     | 1.9325                 | 0.0004         |
| ZNF257                 | Zinc finger protein 257                                              | 1.8978                 | 0.0003         |
| IL6                    | Interleukin 6 (interferon, beta 2)                                   | 1.8500                 | 0.0447         |
| DCAF8L1                | DDB1 and CUL4 associated factor 8-like 1                             | 1.8329                 | 0.0229         |
| PLEKHA7                | Pleckstrin homology domain containing, family A member               | 1.8110                 | 0.0047         |
| EHF                    | Ets homologous factor                                                | 1.8079                 | 0.0119         |
| SPOCK1                 | Sparc/osteonectin, cwcv and kazal-like domains proteoglycan (testis) | 1.8060                 | 0.0003         |
| ACTR3C                 | RP3 actin-related protein 3 homolog C (yeast)                        | 1.8054                 | 0.0131         |
| CRLF2                  | Cytokine receptor-like factor 2                                      | 1.7910                 | 0.0037         |
| EGR1                   | Early growth response 1                                              | 1.7818                 | 0.0501         |
| GJA5                   | Gap junction protein, alpha 5, 40kDa                                 | 1.7779                 | 0.0175         |
| PSG4                   | Pregnancy specific beta-1-glycoprotein 4                             | 1.7765                 | 0.0392         |
| COL6A3                 | Collagen, type VI, alpha 3                                           | 1.7606                 | 0.0003         |

**Table S3. Down regulated genes at high calcium**

| <b>GENE SYMBOL</b> | <b>GENE DESCRIPTION</b>                                     | <b>FOLD CHANGE</b> | <b>P-VALUE</b> |
|--------------------|-------------------------------------------------------------|--------------------|----------------|
| C15orf51           | Dynamin 1 pseudogene                                        | -4.13153           | 0.00034        |
| REXO1L1            | RNA exonuclease 1 homolog (S. cerevisiae)-like 1            | -2.2933            | 0.00670        |
| NRK                | Nik related kinase                                          | -2.19675           | 0.01087        |
| REXO1L2P           | RNA exonuclease 1 homolog (S. cerevisiae)-like 2 (pseudo    | -2.15397           | 0.00065        |
| HLA-DRA            | Major histocompatibility complex, class II, DR alpha        | -2.13535           | 0.00013        |
| EPB41L3            | Erythrocyte membrane protein band 4.1-like 3                | -2.08737           | 0.02883        |
| RFPL4A             | Ret finger protein-like 4A                                  | -2.03611           | 0.00189        |
| LCE2D              | Late cornified envelope 2D                                  | -2.03231           | 0.00019        |
| FOLH1              | Folate hydrolase (prostate-specific membrane antigen) 1     | -1.88823           | 0.01010        |
| DUX4L4             | Double homeobox 4 like 4                                    | -1.87542           | 0.03024        |
| LOC349196          | Hypothetical LOC349196                                      | -1.84076           | 0.00020        |
| LY86-AS            | LY86 antisense RNA (non-protein coding)                     | -1.83354           | 0.00210        |
| ICOSLG             | Inducible T-cell co-stimulator ligand                       | -1.83162           | 0.00433        |
| ABCA1              | ATP-binding cassette, sub-family A (ABC1), member 1         | -1.821             | 0.00909        |
| TNFSF18            | Tumor necrosis factor (ligand) superfamily, member 18       | -1.81363           | 0.00013        |
| HLA-DRB3           | Major histocompatibility complex, class II, DR beta 3       | -1.81248           | 0.00030        |
| LOC10013247        | Hypothetical LOC100132147                                   | -1.79995           | 0.01067        |
| MUC12              | Mucin 12, cell surface associated                           | -1.76713           | 0.00076        |
| HLA-DPB1           | Major histocompatibility complex, class II, DP beta 1       | -1.74847           | 0.00033        |
| IGHA1              | Immunoglobulin heavy constant alpha 1                       | -1.73004           | 0.00147        |
| ZFPM2              | Zinc finger protein, multitype 2                            | -1.71818           | 0.01157        |
| SCD                | Stearoyl-CoA desaturase (delta-9-desaturase)                | -1.71338           | 0.08876        |
| ASB2               | Ankyrin repeat and SOCS box-containing 2                    | -1.71158           | 0.00926        |
| IGHD               | Immunoglobulin heavy constant delta                         | -1.70471           | 0.05360        |
| SPRY1              | Sprouty homolog 1, antagonist of FGF signaling (Drosophila) | -1.69598           | 0.00043        |
| HLA-DRB4           | Major histocompatibility complex, class II, DR beta 4       | -1.68976           | 0.00049        |
| HLA-DRB3           | Major histocompatibility complex, class II, DR beta 3       | -1.67505           | 0.00041        |
| GMFG               | Glia maturation factor, gamma                               | -1.66292           | 0.00452        |
| CCNA1              | Cyclin A1                                                   | -1.6413            | 0.00670        |

**Table S4. Pathways modulated by high extracellular calcium**

| <b>PATHWAY</b>                                                 | <b>PATHWAY<br/>ENTITIES</b> | <b>MATCHED<br/>ENTITIES</b> | <b>P-VALUE</b> |
|----------------------------------------------------------------|-----------------------------|-----------------------------|----------------|
| Hs Senescence and Autophagy                                    | 106                         | 5                           | 1.69E-04       |
| Hs Cytokines and Inflammatory Response                         | 30                          | 3                           | 1.83E-04       |
| Hs Adipogenesis                                                | 131                         | 5                           | 4.34E-04       |
| Hs Dissolution of Fibrin Clot                                  | 8                           | 2                           | 6.41E-04       |
| Hs Vitamin B12 Metabolism                                      | 54                          | 3                           | 0.001954       |
| Hs TGF Beta Signaling Pathway                                  | 55                          | 3                           | 0.002428       |
| Hs SREBF and miR33 in cholesterol and lipid homeostasis        | 18                          | 2                           | 0.003026       |
| Hs Folate Metabolism                                           | 68                          | 3                           | 0.004074       |
| Hs Glutathione metabolism                                      | 20                          | 2                           | 0.004187       |
| Hs Blood Clotting Cascade                                      | 22                          | 2                           | 0.005059       |
| Hs Selenium Pathway                                            | 85                          | 3                           | 0.007709       |
| Hs Epigenetic Stress Regulation                                | 1                           | 1                           | 0.009682       |
| Hs MAPK targets-Nuclear events mediated by MAP kinases         | 8                           | 1                           | 0.038172       |
| Hs Myometrial Relaxation and Contraction Pathways              | 156                         | 3                           | 0.039814       |
| Hs Sudden Infant Death Syndrome (SIDS) Susceptibility Pathways | 66                          | 2                           | 0.040927       |
| Hs Insulin Signaling                                           | 160                         | 3                           | 0.043075       |

## 2. Supplementary Figures

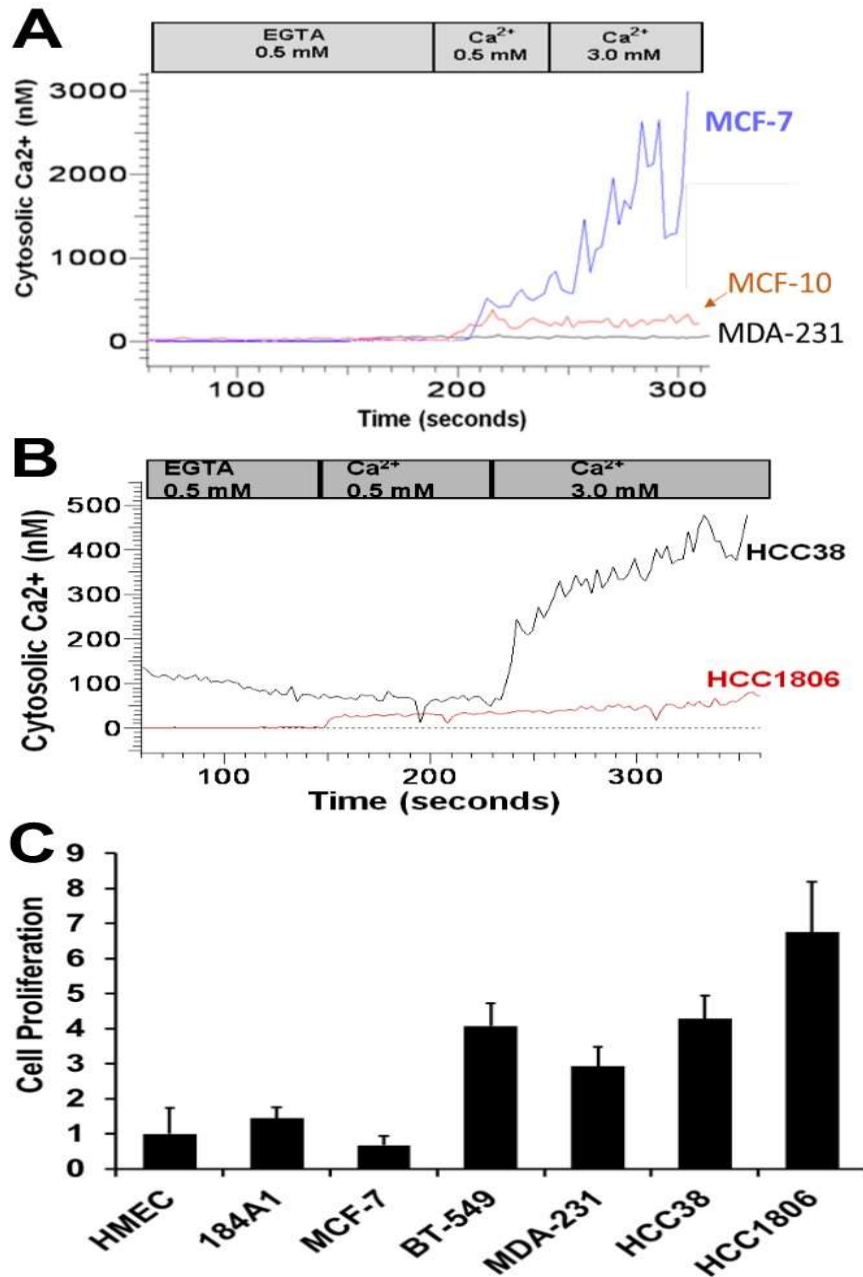

**Figure S1. Differential calcium influx dynamics and survival of Breast epithelial and breast cancer cells at high Ca<sup>2+</sup>.** (A, B) The indicated cell lines were grown to 80% confluency, harvested by trypsinization and loaded with fura-2 AM for 1 h. Cells were washed twice in Ca<sup>2+</sup> and Mg<sup>2+</sup>-free Hanks balanced salt solution (HBSS) and intracellular Ca<sup>2+</sup> levels were measured using the Hitachi F2500 spectrofluorimeter with addition of the indicated solutions. (C). Cells were cultured in complete medium supplemented with 5.0 mM Ca<sup>2+</sup> and the viability/proliferation was measured as described in Fig. 1E and normalized relative to the primary human epithelial cells (HMEC).

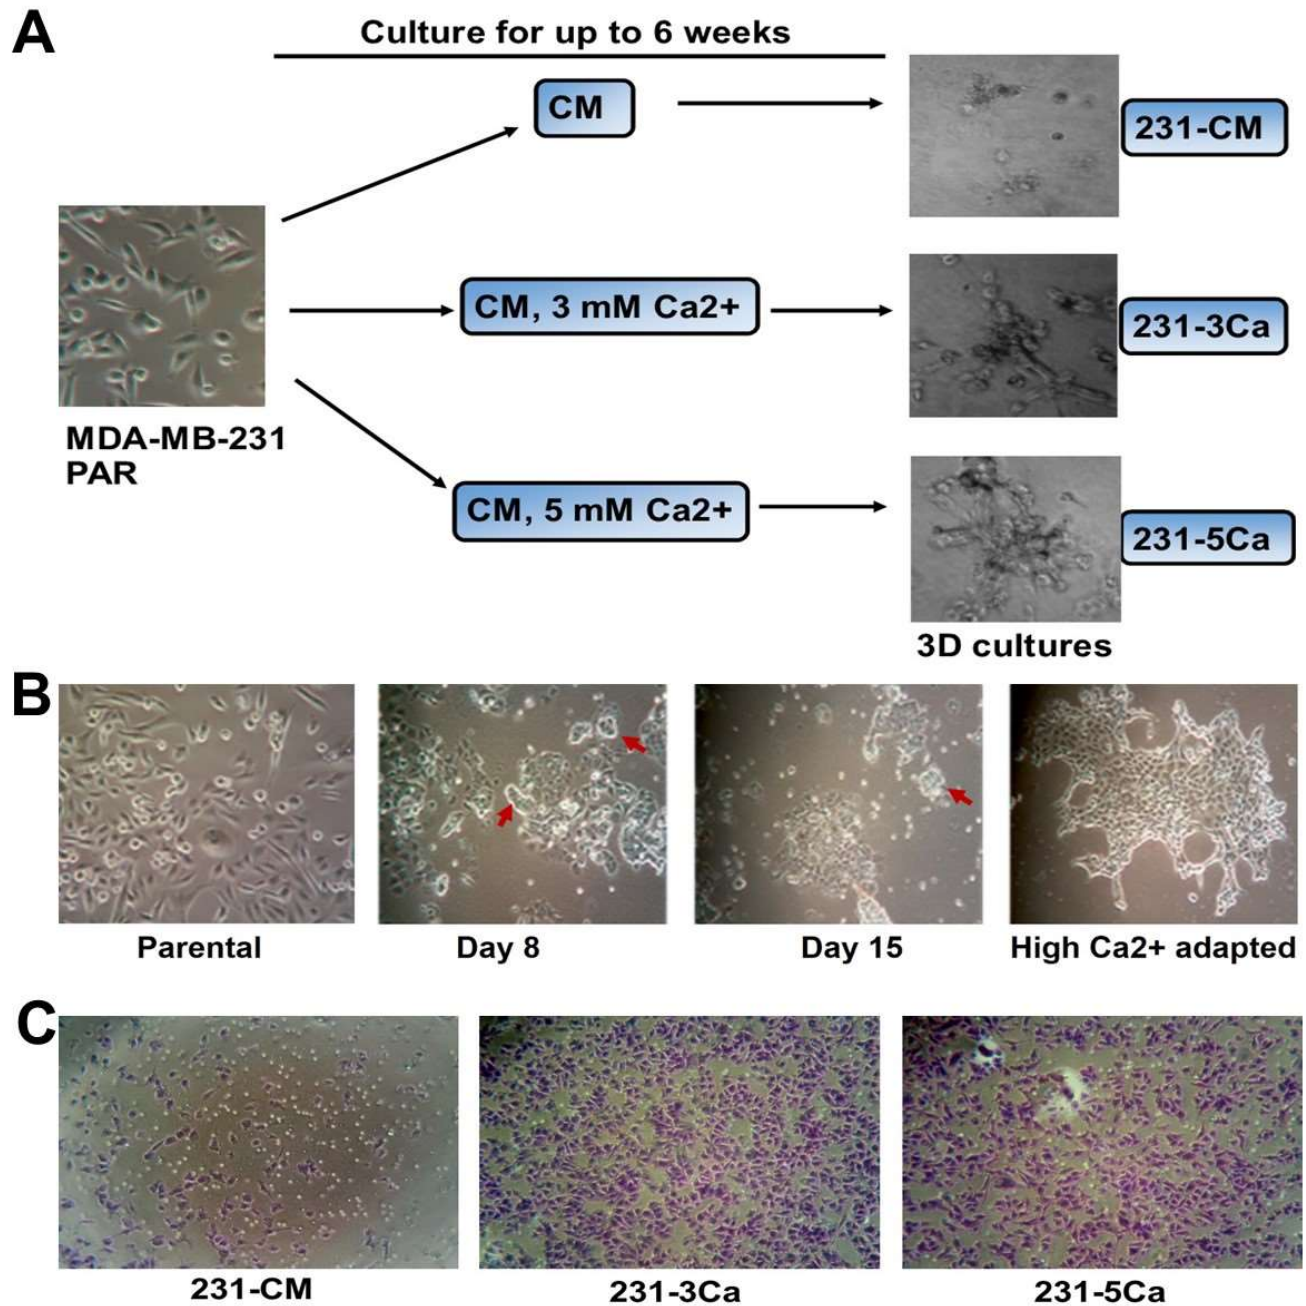

**Figure S2. Adaptation of TNBC cells to high  $\text{Ca}^{2+}$  in vitro.** **A)** Parental MDA-MB-231 cells were cultured in complete medium or complete medium supplemented with 3.0 or 5.0 mM  $\text{Ca}^{2+}$  for up to 6 weeks. **B)** The morphology of the cells during the continuous culture at high  $\text{Ca}^{2+}$ . Arrows indicate colonies of surviving cells by day 8 of the selection process. **C)** Migration of control and high  $\text{Ca}^{2+}$  adapted MDA-MB-231 cells. Cells were plated in Boyden chambers in serum-free medium and complete medium containing 10% FBS was used as chemoattractant. Shown are representative images from at least three fields.

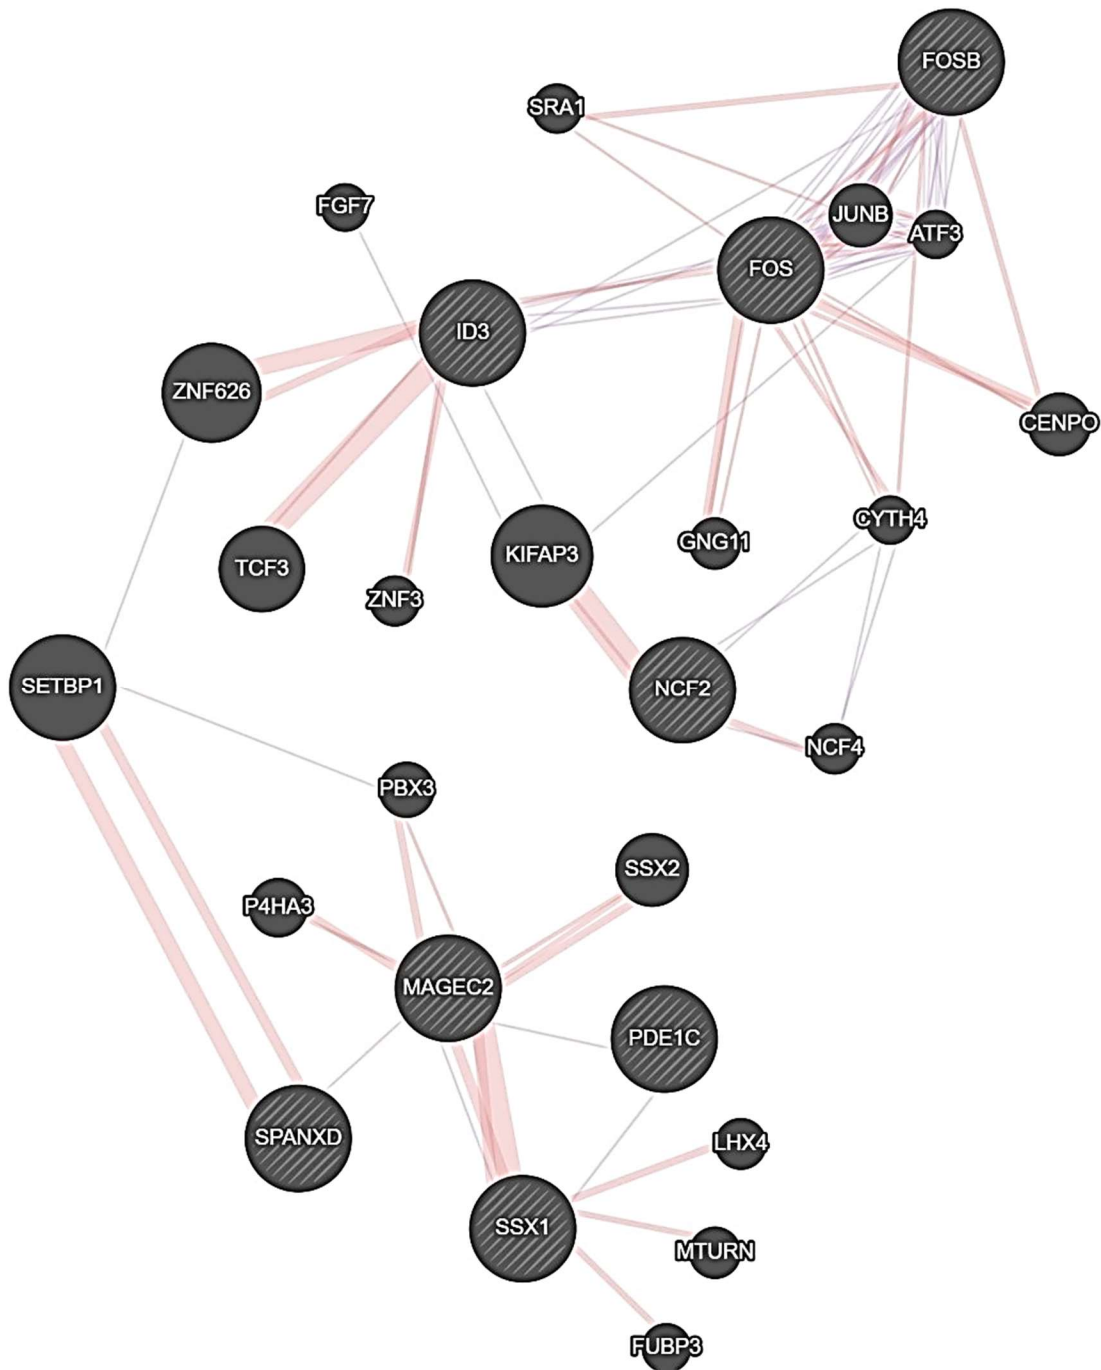

**Figure S3. Biological network relationship of up regulated (high  $\text{Ca}^{2+}$  inducible) genes.** The hashed nodes indicate genes identified to be up regulated at high  $\text{Ca}^{2+}$  in MDA-MB-231 TNBC cells and the physical interactions co-expression analyzed by using genemania (<https://genemania.org/>) are indicated by pink and purple connections respectively.

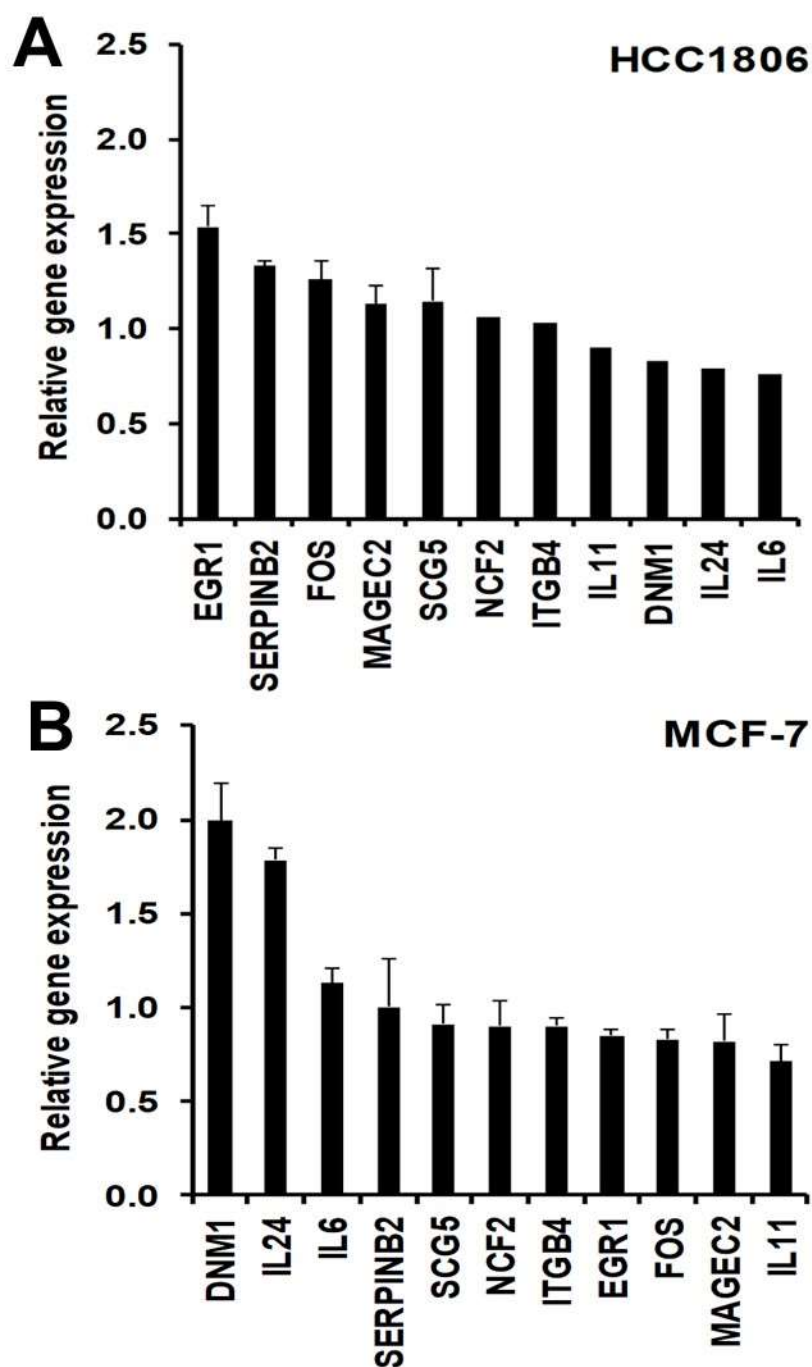

**Figure S4. Validation of upregulated genes in high  $\text{Ca}^{2+}$  treated breast cancer cells.** The indicated high  $\text{Ca}^{2+}$  inducible genes were validated by RT-PCR in HCC1806 (A) and MCF-7 (B) breast cancer cells. Bars represent gene expression relative to GAPDH control.



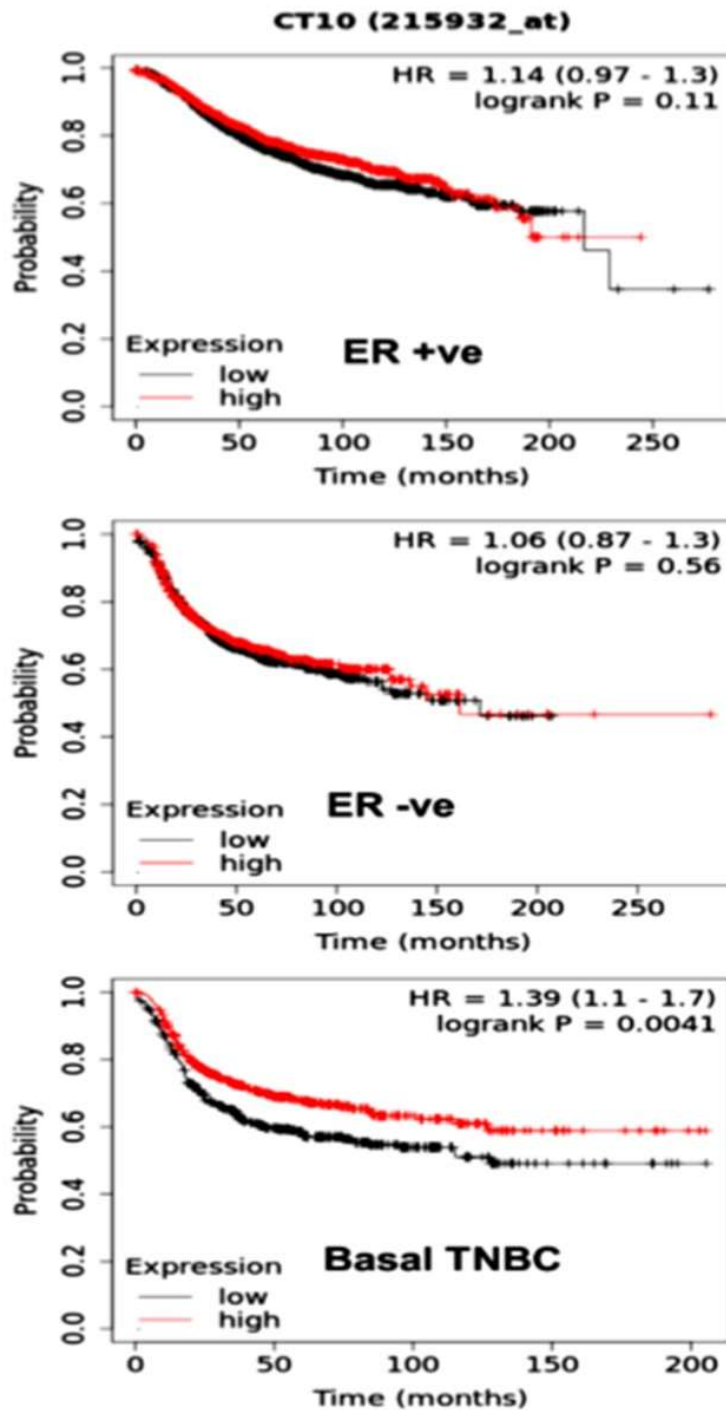

**Figure S5. Clinical relevance of MAGEC2 expression in basal-like breast cancer relative to ER positive and ER negative breast cancer.** The relapse-free survival of patients with ER-positive and ER-negative breast cancer as well as basal-like TNBC was analyzed as a function of high (red) and low (black) expression levels above and below the median value respectively, by using the Kaplan Meier survival analysis tool, KM plotter for breast cancer.
